# Supplementary material
Source: Elsevier journal article supplement (https://www.sciencedirect.com/science/article/pii/S0034935612002265)
Supplement: mmc1 [file S0034935612002265:mmc1.pdf]

## MATERIAL PARA WEB

### Anexo.

Transcripción de los Artículos 14 y 15, publicados en la Gaceta de Madrid del capítulo tercero (Figura 2), sobre “Deberes y obligaciones de los Jefes y Oficiales del cuerpo. De los Inspectores”:

*-“Art. 14. Con el objeto de que no decaiga el amor al estudio, la afición al adelanto de la ciencia, y a fin de que esto redunde en beneficio de la humanidad, reunirán una vez al mes en sus oficinas a los Jefes y Oficiales del cuerpo que se encuentren en el Departamento para conferenciar sobre un caso práctico de Medicina o Cirugía, o acerca de una tesis concerniente a higiene naval; que se designará con anterioridad, sobre lo que disertará el que le corresponda con arreglo al turno que debe establecerse de moderno a antiguo, haciendo objeciones dos de los concurrentes que por el mismo turno nombre el Inspector, pudiendo tomar parte en la discusión cualquiera de los concurrentes.*

*-“Art. 15. El Inspector de Sanidad presidirá estas Conferencias, conservará el orden en ellas y dará sin excusa alguna conocimiento del resultado al Almirantazgo, remitiendo, no solo las Memorias, sino un extracto de las reflexiones que se hiciesen, a fin de que estos trabajos literarios se tengan en cuenta para las notas de concepto de los que hayan tomado parte en el certamen. El Profesor más moderno de la reunión servirá de Secretario”.*
