# Supplementary material
Source: Elsevier journal article supplement (https://www.sciencedirect.com/science/article/pii/S0034935612002265)
Supplement: mmc2 [file S0034935612002265:mmc2.pdf]

TABLA 1. Ficha documental de la memoria clínica titulada: “La anestesia”.

|                                  |                                                                                                                                |
|----------------------------------|--------------------------------------------------------------------------------------------------------------------------------|
| <b>Memoria clínica</b>           | La Anestesia.                                                                                                                  |
| <b>Nombre del autor</b>          | Juan Jorge de los Ríos.                                                                                                        |
| <b>Título de la obra</b>         | La anestesia.                                                                                                                  |
| <b>Signatura</b>                 | AGMAB 2.898/92.                                                                                                                |
| <b>Localidad</b>                 | El Viso del Marqués. (Ciudad Real).                                                                                            |
| <b>Depósito</b>                  | Archivo General de la Marina “Álvaro de Bazán”.                                                                                |
| <b>Sección</b>                   | Sanidad.                                                                                                                       |
| <b>Fecha del documento</b>       | 20 de abril de 1870.                                                                                                           |
| <b>Lugar</b>                     | Ferrol (A Coruña).                                                                                                             |
| <b>Soporte</b>                   | papel.                                                                                                                         |
| <b>Páginas</b>                   | 46, tamaño cuartilla (A5 aprox.); 3 folio.                                                                                     |
| <b>Organización de la página</b> | Escrito en anverso y reverso; cuadernillo; escritura continua; renglones de 28 a 29.                                           |
| <b>Escritura</b>                 | pluma.                                                                                                                         |
| <b>Tipo de escritura</b>         | cursiva. Legible, relativa dificultad de lectura.                                                                              |
| <b>Lengua</b>                    | castellano.                                                                                                                    |
| <b>Encuadernación</b>            | Sí. Flexible, cosido con hilo.                                                                                                 |
| <b>Estado de conservación</b>    | aceptable.                                                                                                                     |
| <b>Descriptores</b>              | ciencia médica. Anestesia. Historia. Éter sulfúrico. Cirugía. Dolor.                                                           |
| <b>Comentario</b>                | Bien escrito; bien estructurado; lenguaje científico; instructivo; alto nivel científico.                                      |
| <b>Autoridad</b>                 | Acta certificando la sesión; Bartolomé Gómez Bustamante, Inspector General de la Armada que remite la memoria al Almirantazgo. |

TABLA 2. Ficha documental de la memoria clínica titulada “Empleo quirúrgico del cloroformo”

|                                  |                                                                                                                                                                                                                                                                                                                                                                                                  |
|----------------------------------|--------------------------------------------------------------------------------------------------------------------------------------------------------------------------------------------------------------------------------------------------------------------------------------------------------------------------------------------------------------------------------------------------|
| <b>Memoria clínica</b>           | Empleo quirúrgico del cloroformo.                                                                                                                                                                                                                                                                                                                                                                |
| <b>Nombre del autor</b>          | Ildefonso Sanz Domenech.                                                                                                                                                                                                                                                                                                                                                                         |
| <b>Título de la obra</b>         | Empleo quirúrgico del cloroformo.                                                                                                                                                                                                                                                                                                                                                                |
| <b>Signatura</b>                 | AGMAB 2.900/20.                                                                                                                                                                                                                                                                                                                                                                                  |
| <b>Localidad</b>                 | El Viso del Marqués. (Ciudad Real).                                                                                                                                                                                                                                                                                                                                                              |
| <b>Depósito</b>                  | Archivo General de la Marina “Álvaro de Bazán”.                                                                                                                                                                                                                                                                                                                                                  |
| <b>Sección</b>                   | Sanidad.                                                                                                                                                                                                                                                                                                                                                                                         |
| <b>Fecha del documento</b>       | 19 de julio de 1894.                                                                                                                                                                                                                                                                                                                                                                             |
| <b>Lugar</b>                     | Ferrol (A Coruña).                                                                                                                                                                                                                                                                                                                                                                               |
| <b>Soporte</b>                   | papel.                                                                                                                                                                                                                                                                                                                                                                                           |
| <b>Páginas</b>                   | 58, tamaño cuartilla (A5 aprox.). En nota figura: “vino sin acta”.                                                                                                                                                                                                                                                                                                                               |
| <b>Organización de la página</b> | Escrito en anverso y reverso; numeradas; cuadernillo; escritura continua; renglones de 26 a 27.                                                                                                                                                                                                                                                                                                  |
| <b>Escritura</b>                 | pluma.                                                                                                                                                                                                                                                                                                                                                                                           |
| <b>Tipo de escritura</b>         | cursiva. Legible, relativa dificultad de lectura.                                                                                                                                                                                                                                                                                                                                                |
| <b>Lengua</b>                    | castellano.                                                                                                                                                                                                                                                                                                                                                                                      |
| <b>Encuadernación</b>            | Sí. Flexible, cosido con hilo.                                                                                                                                                                                                                                                                                                                                                                   |
| <b>Estado de conservación</b>    | aceptable.                                                                                                                                                                                                                                                                                                                                                                                       |
| <b>Descriptores</b>              | ciencia médica. Cloroformo, composición química. Historia. Cirugía. Dolor.                                                                                                                                                                                                                                                                                                                       |
| <b>Comentario</b>                | Bien escrito; bien estructurado; lenguaje científico; instructivo; nivel científico. El autor conocía la anterior memoria sobre la Anestesia. Posiblemente sean memorias complementarias en el campo de la Sanidad de la Marina. A pesar de la fecha de documentos siguientes hemos preferido situar esta memoria en segundo lugar por la relación que une al tema tratado: Anestesia/cloroformo |
| <b>Autoridad</b>                 | Carece de acta de presentación, pero, sometido a una rigurosa crítica documental cumple los requisitos de ser una fuente primaria.                                                                                                                                                                                                                                                               |
